# Supplementary material for: DNA methylation predicts the outcome of COVID-19 patients with acute respiratory distress syndrome
Source: Springer Nature journal article supplement (doi:10.1186/s12967-022-03737-5), 2022-11-12

## Supplemental Figures legends

**Supplemental Figure 1. PCA plot of controls and COVID-19 patients at baseline for 750874 CpG sites.** Representation by COVID-19 (red dots) and controls (blue dots) is shown, and the proportion of variance is explained by each PC (PC1 and PC2).

**Supplemental Figure 2. Representation of the Akaike Information Criterion (AIC) for the comparison of different linear models tested to determine the best model suitable for the analysis.** Every letter corresponds to a different tested model: **(A)** None=no covariates. A= Age. B=Ethnicity. C=Age, ethnicity. D=Age, ethnicity, the proportion of CD8 T cells, CD4 T cells, and B cells. E=Age, the proportion of CD8 T cells, CD4 T cells, and B cells. F=The proportion of CD8 T cells, CD4 T cells, and B cells. G= The proportion of CD8 T cells and CD4 T cells. H= The proportion of CD8 T cells. I= The proportion of B cells. J= The proportion of CD4 T cells. **(B).** Different letters correspond to a different tested model: None= CpG methylation ~ Dead/recovered, A= CpG methylation ~ Dead/recovered + Age, B= CpG methylation ~ Dead/recovered + Age + MV days, C= CpG methylation ~ Dead/recovered + Age + MV days + Gender, D= CpG methylation ~ Dead/recovered + Age + MV days + Gender + ICU stay, E= CpG methylation ~ Dead/recovered + Age + MV days + Gender + ICU LoS + ECMO, J= CpG methylation ~ Dead/recovered + Age + MV days + Gender + ICU LoS + ECMO + Nosocomial infections, K= CpG methylation ~ Dead/recovered + Age + MV days + ICU LoS + ECMO, L= CpG methylation ~ Dead/recovered + ICU LoS + ECMO, M= CpG methylation ~ Dead/recovered + Age + ICU LoS, G= CpG methylation ~ Dead/recovered + Age + ICU stay + ECMO, H= CpG methylation ~ Dead/recovered + Age + MV days + ICU LoS + ECMO + Nosocomial infections, I= CpG methylation ~ Dead/recovered + Age + MV days + Gender + ECMO.

**Supplemental Figure E3: Miami plot from the genome-wide differential methylation between COVID-19 and controls.** The plot shows the result of the COVID-19 severity association test over 750874 CpG positions. The red line designates the genome-wide significance threshold of a Benjamini-Hochberg corrected P-value  $< 0.05$ . Green dots represent significantly different CpGs from the previously reported genes associated with COVID-19<sup>(1-7)</sup>. The upper panel represents hypermethylated CpGs, while the lower panel represents hypomethylated CpGs.

1. Castro de Moura M, Davalos V, Planas-Serra L, Alvarez-Errico D, Arribas C, Ruiz M, et al. Epigenome-wide association study of COVID-19 severity with respiratory failure. *EBioMedicine*. 2021;66:103339.
2. Severe Covid GG, Ellinghaus D, Degenhardt F, Bujanda L, Buti M, Albillos A, et al. Genomewide Association Study of Severe Covid-19 with Respiratory Failure. *N Engl J Med*. 2020;383(16):1522-34.
3. Pairo-Castineira E, Clohisey S, Klaric L, Bretherick AD, Rawlik K, Pasko D, et al. Genetic mechanisms of critical illness in COVID-19. *Nature*. 2021;591(7848):92-8.
4. Zhang Q, Bastard P, Liu Z, Le Pen J, Moncada-Velez M, Chen J, et al. Inborn errors of type I IFN immunity in patients with life-threatening COVID-19. *Science*. 2020;370(6515).
5. Bastard P, Rosen LB, Zhang Q, Michailidis E, Hoffmann HH, Zhang Y, et al. Autoantibodies against type I IFNs in patients with life-threatening COVID-19. *Science*. 2020;370(6515).
6. van der Made CI, Simons A, Schuurs-Hoeijmakers J, van den Heuvel G, Mantere T, Kersten S, et al. Presence of Genetic Variants Among Young Men With Severe COVID-19. *Jama-J Am Med Assoc*. 2020;324(7):663-73.
7. Singh H, Choudhari R, Nema V, Khan AA. ACE2 and TMPRSS2 polymorphisms in various diseases with special reference to its impact on COVID-19 disease. *Microb Pathogenesis*. 2021;150.

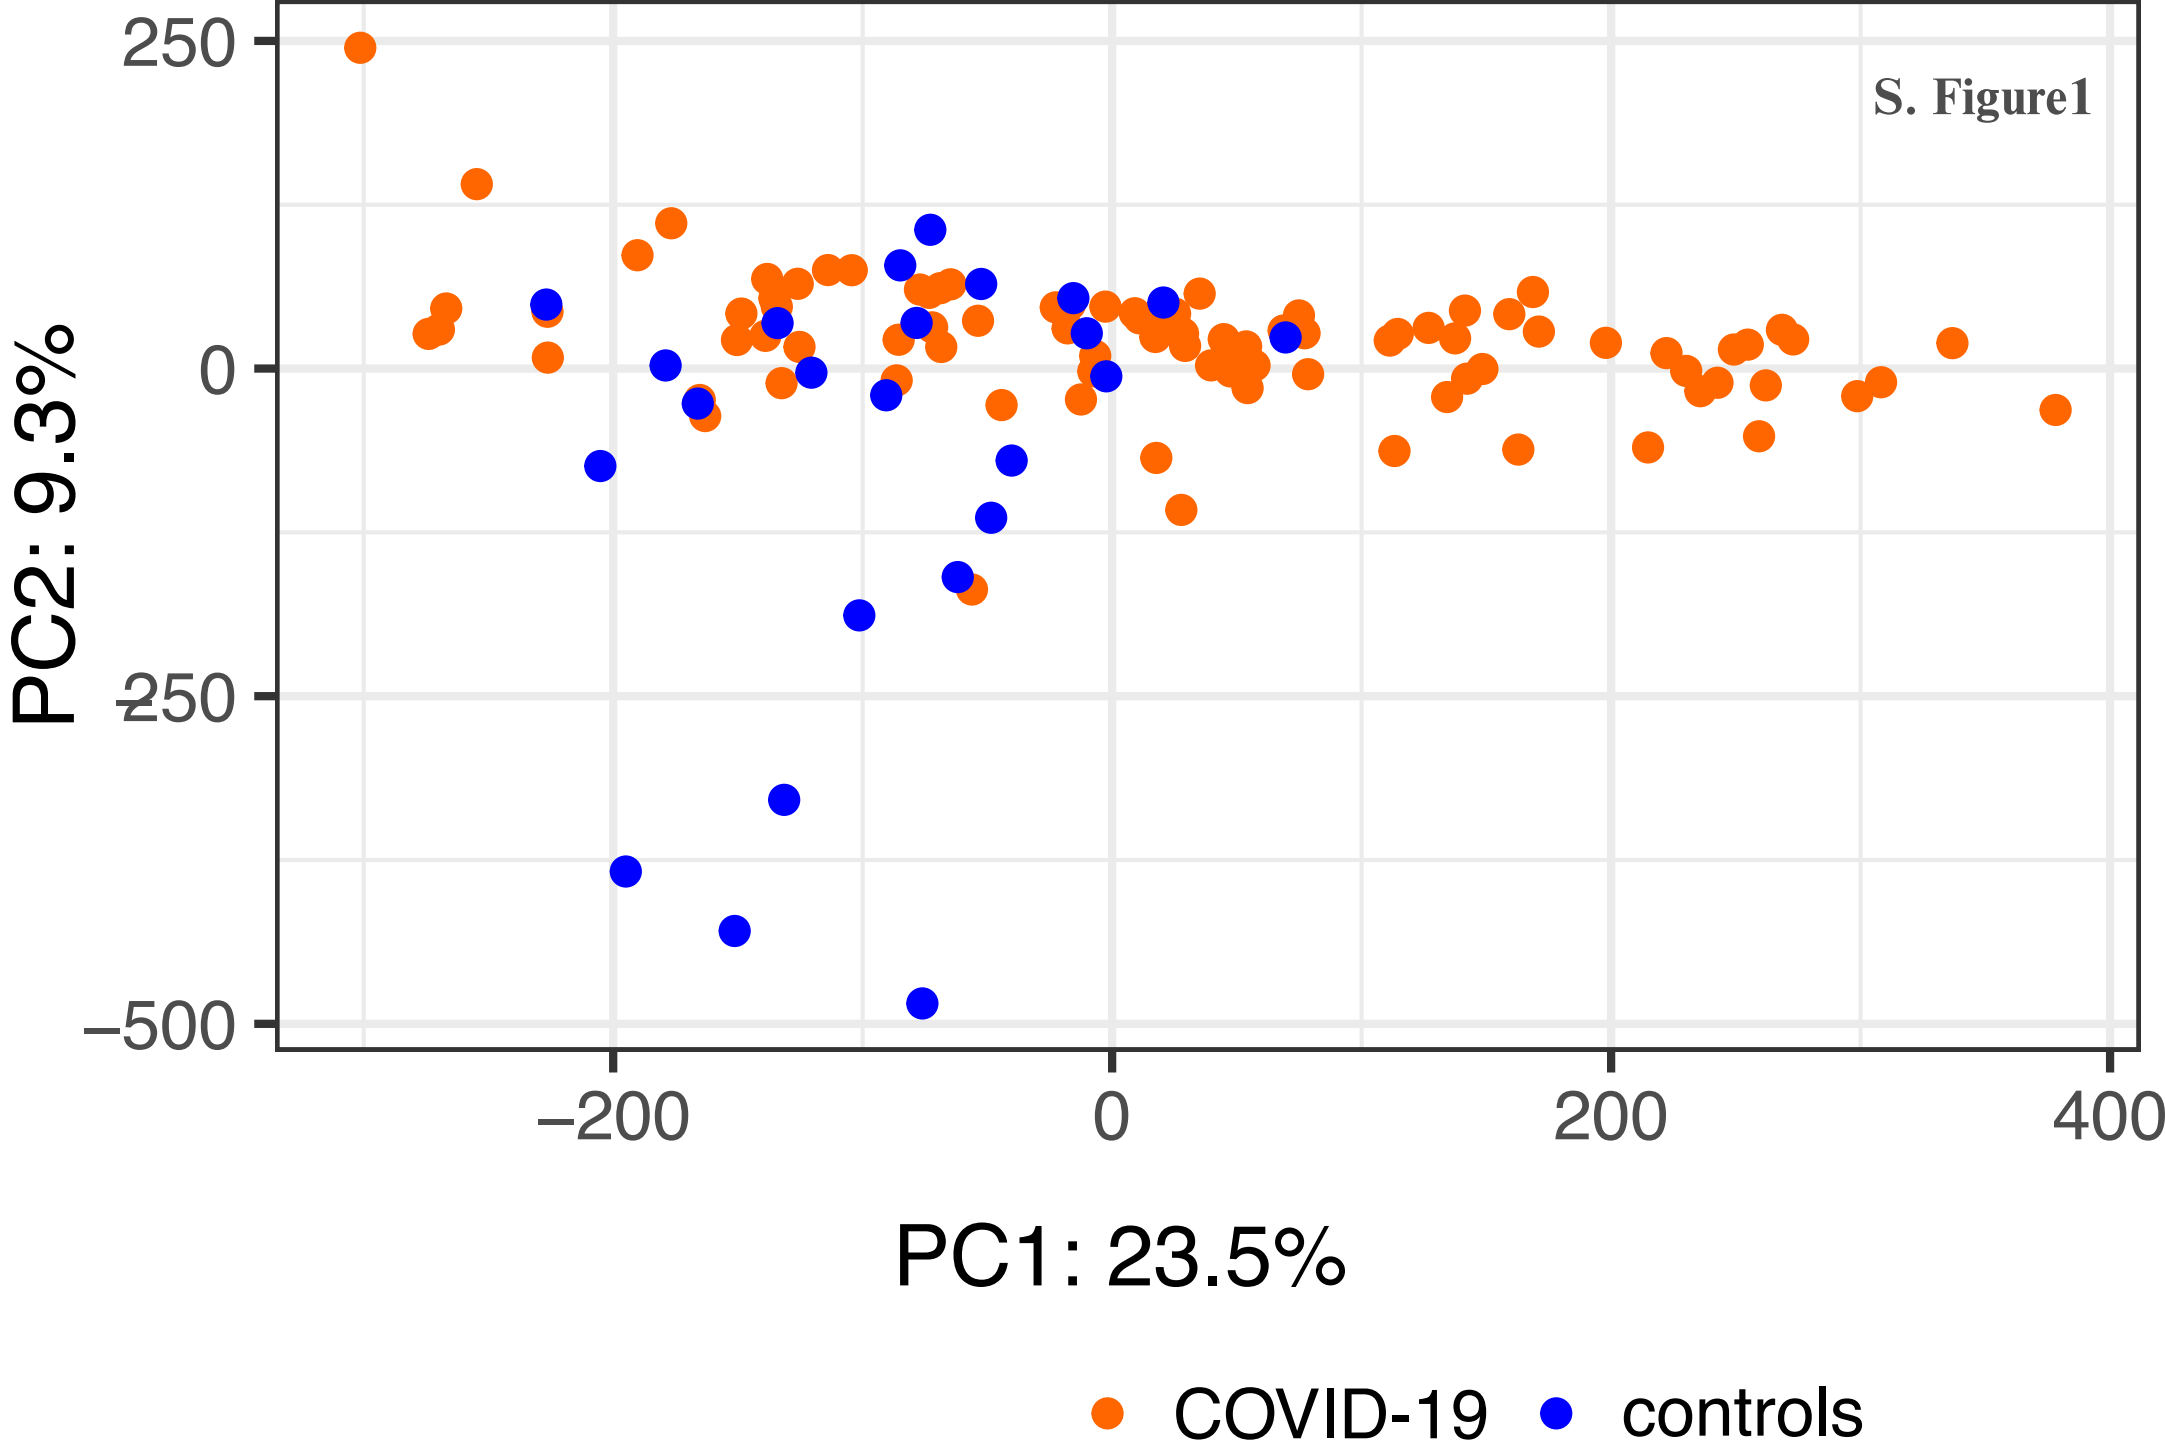

**A**

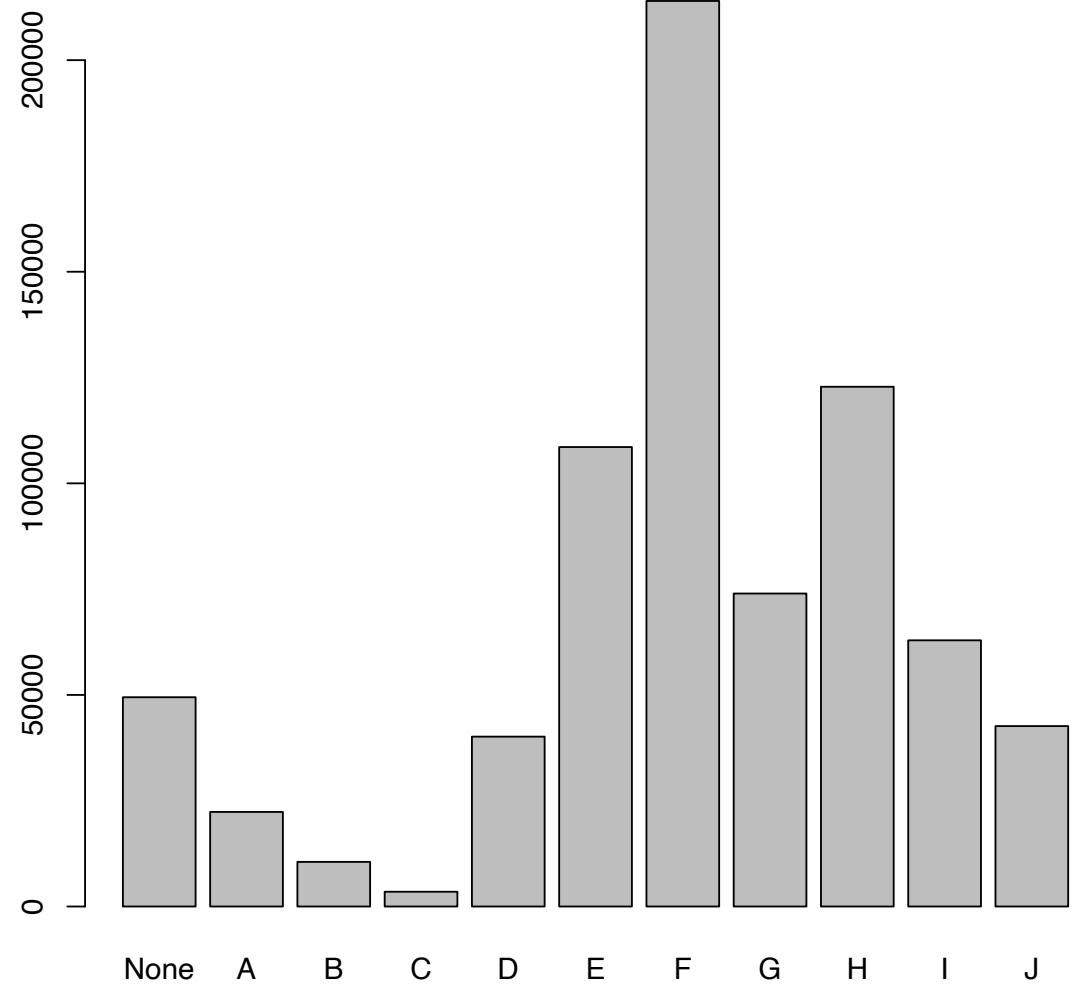

**B**

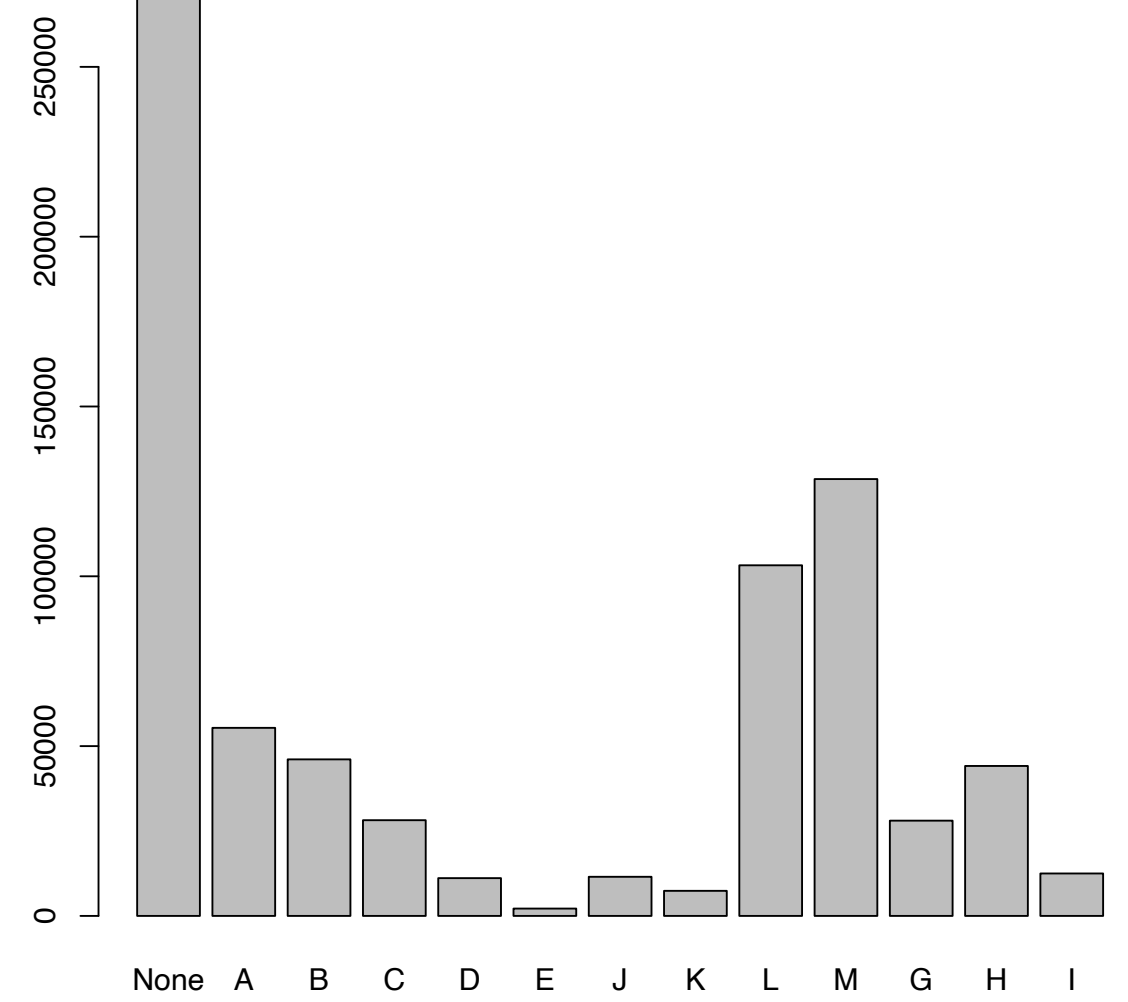

S. Figure 3

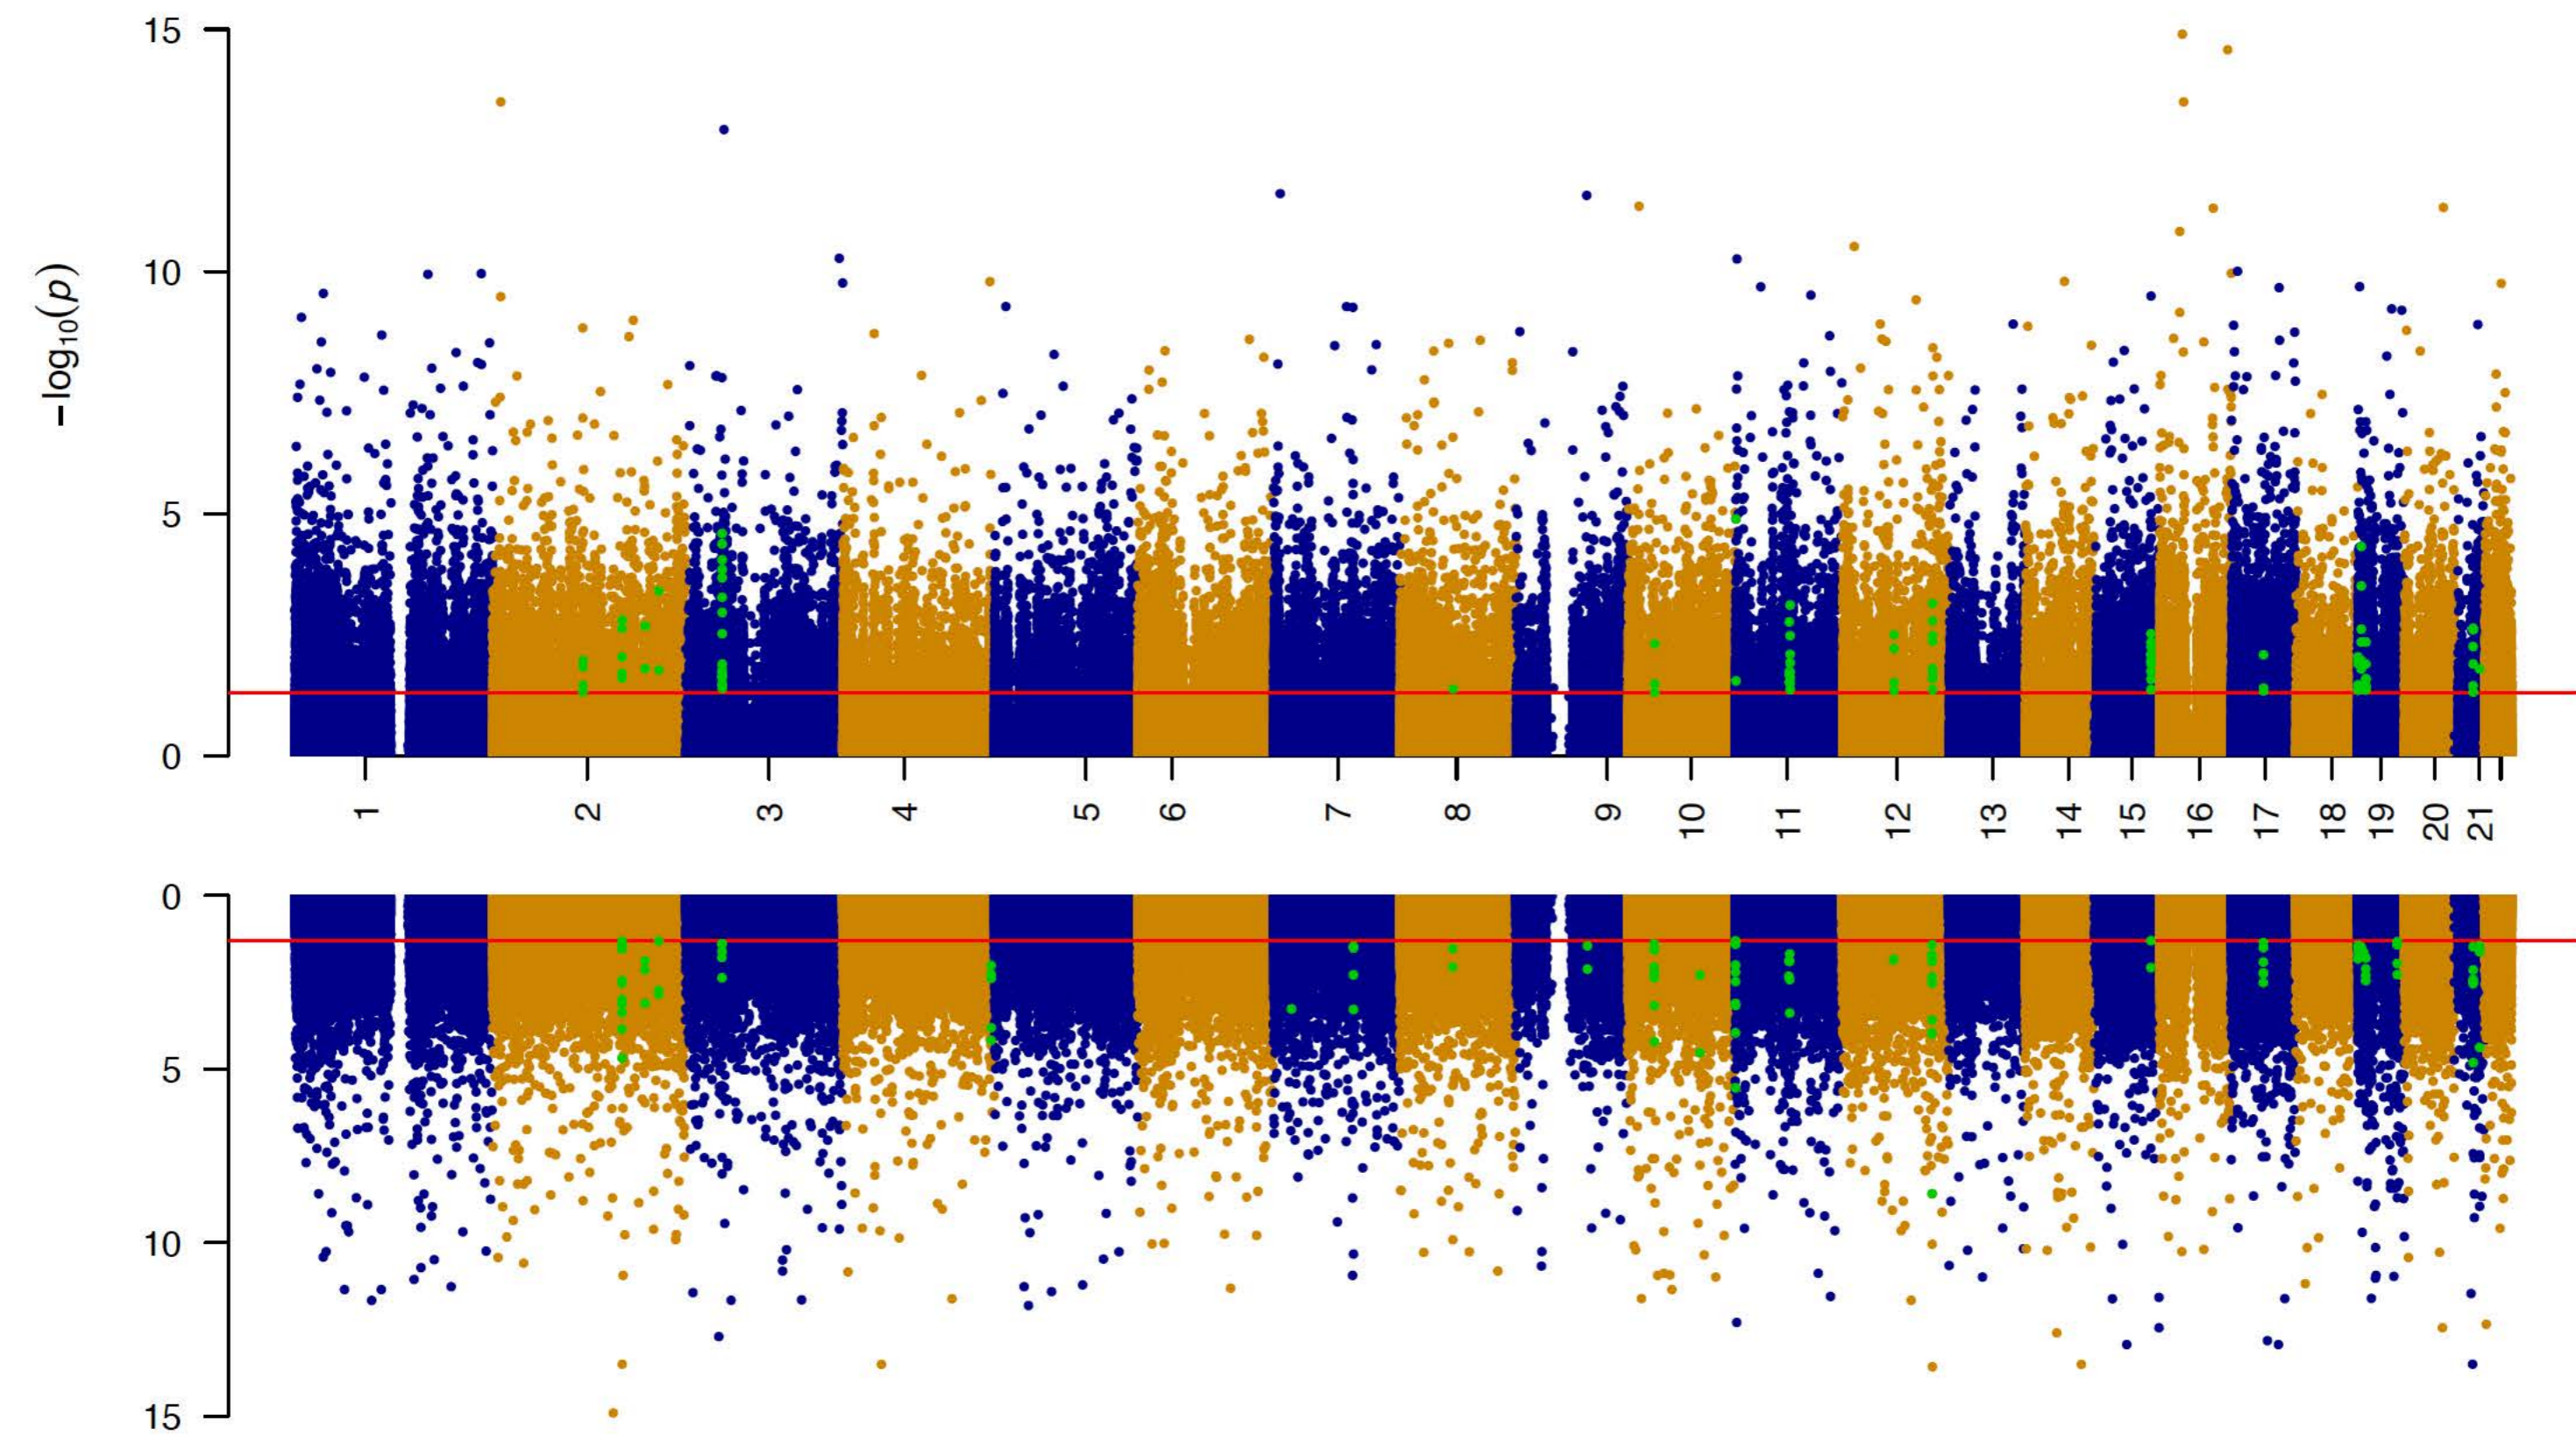

Supplement: MOESM11 [file 23705604]
